# Supplementary material for: pH-Dependent Assembly and Segregation of the Coiled-Coil Segments of Yeast Putative Cargo Receptors Emp46p and Emp47p
Source: PLOS journal article supplement (doi:10.1371/journal.pone.0140287), 2015-10-08
Supplement: S6 (10.1371/journal.pone.0140287.s006) [file journal.pone.0140287.s006]

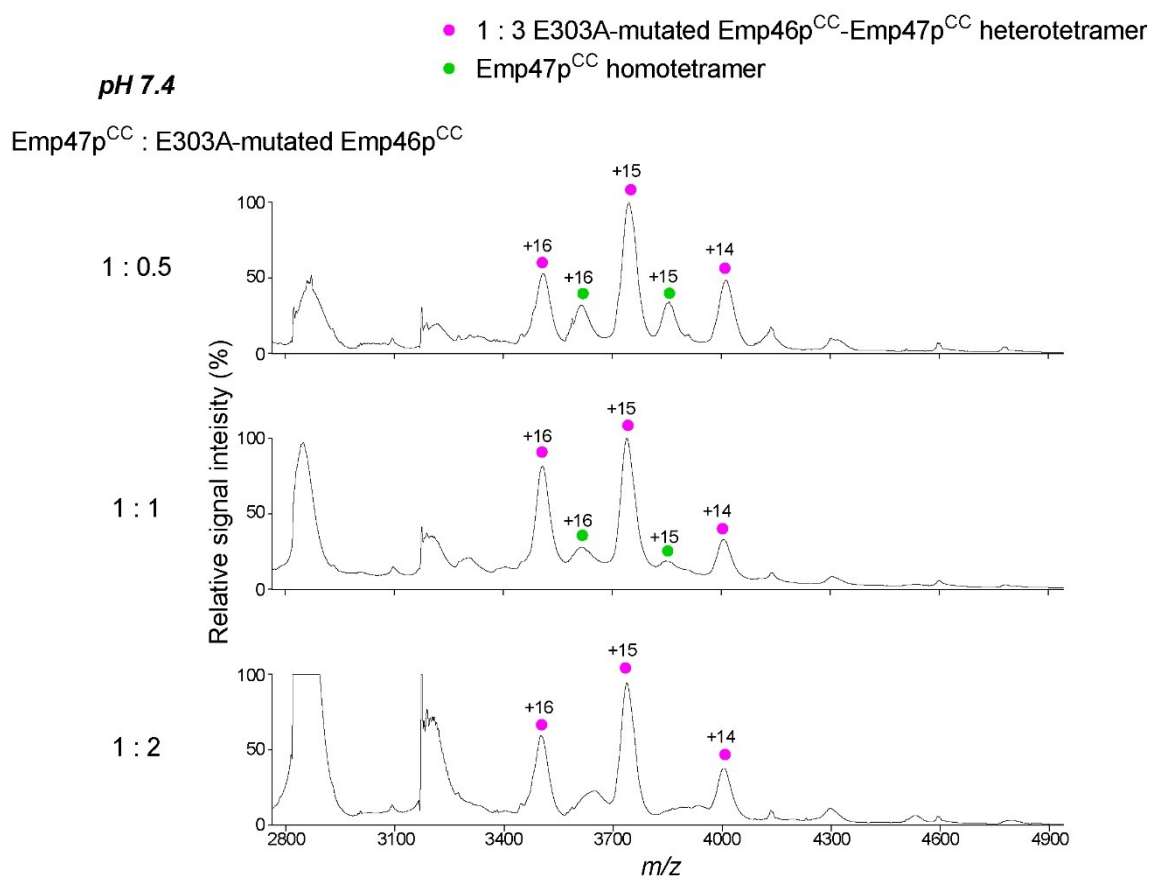

**S6 Fig. Mass spectra of the mixtures of Emp47p<sup>CC</sup> and the E303A-mutated Emp46p<sup>CC</sup> at pH 7.4.** The concentration of Emp47p<sup>CC</sup> was fixed and that of the mutated Emp46p<sup>CC</sup> was varied at the molar ratios indicated. Peaks corresponding to 1:3 heterotetramers of Emp47p<sup>CC</sup> and the E303A-mutated Emp46p<sup>CC</sup> are indicated by magenta dots with charge states. Peaks corresponding to the homotetramer of Emp47p<sup>CC</sup> are indicated by a green dot with charge states.
